# Supplementary material for: Development of an in situ dissolved oxygen measurement system and calculation of its effective diffusion coefficient in a biofilm
Source: Royal Society of Chemistry journal article supplement (doi:10.1039/c2ay25132a), 2012-01-01
Supplement: c2ay25132a.pdf [file c2ay25132a.pdf]

Supplementary:

**Development of an *in situ* dissolved oxygen measurement system and calculation  
of its effective diffusion coefficient in a biofilm**

Yun-Fang Ning<sup>1,2</sup>, You-Peng Chen<sup>1,2,\*</sup>, Shan Li<sup>1,2</sup>, Jin-Song Guo<sup>1,2</sup>, Xu Gao<sup>1,2</sup>, Fang  
Fang<sup>1,2</sup>, Yu Shen<sup>3</sup>, Na-Na Hu<sup>2</sup>, Kun Zhang<sup>2</sup>

<sup>1</sup>Key Laboratory of the Three Gorges Reservoir Region's Eco-Environments of MOE,  
Chongqing University, Chongqing, 400045, China

<sup>2</sup>College of Urban Construction and Environmental Engineering, Chongqing  
University, Chongqing, 400045, China

<sup>3</sup>Engineering Research Centre for Waste Oil Recovery Technology and Equipment of  
MOE, Chongqing Technology and Business University, Chongqing, 400067, China

**Corresponding Author:**

Dr. You-Peng Chen

Tel: +86 23 65128095; Fax: +86 23 65128095

E-mail: ypchen@cqu.edu.cn

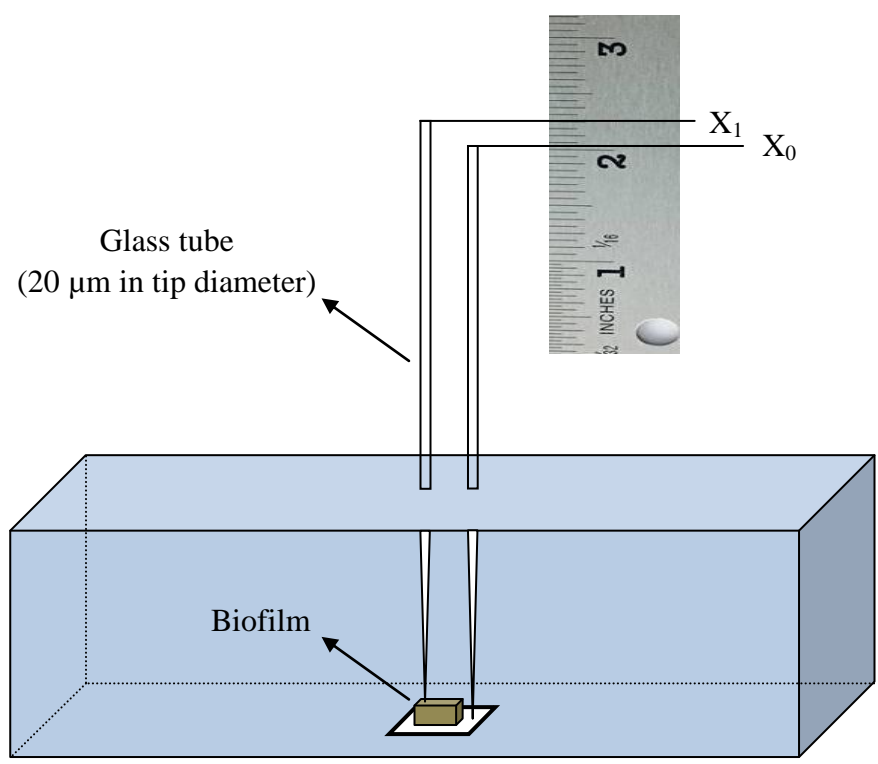

Fig. S1 Schematic of measuring a biofilm thickness.
